# Supplementary material
Source: Springer Nature journal article supplement (https://www.springermedizin.de/resource/supplementary/12894_2006_92_MOESM8_ESM.pdf/9513940)

**A**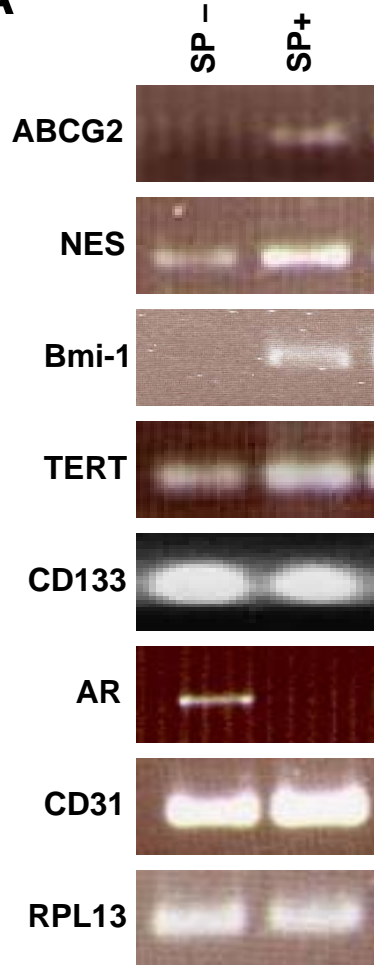**B**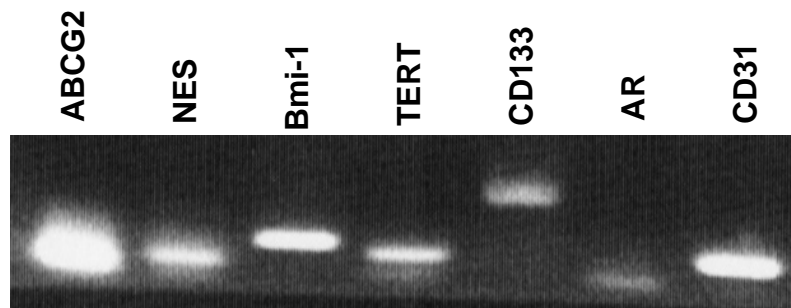

Supplement: MOESM8 [file 9513940]
